# Supplementary material for: The Secretion of IL-22 from Mucosal NKp44+NK Cells Is Associated with Microbial Translocation and Virus Infection in SIV/SHIV-Infected Chinese Macaques
Source: Hindawi journal article supplement (doi:10.1155/2014/387950), 2014-01-01

**Fig. S1. Correlation of peripheral LPS levels and plasma LBP with MT.** (a) The levels of the LPS and LBP were correlated in infected monkeys ( $n=20$ ). (b, c) Comparison of the level of (b) LPS and (c) LBP in naïve, MT<sup>low</sup> and MT<sup>high</sup> groups.

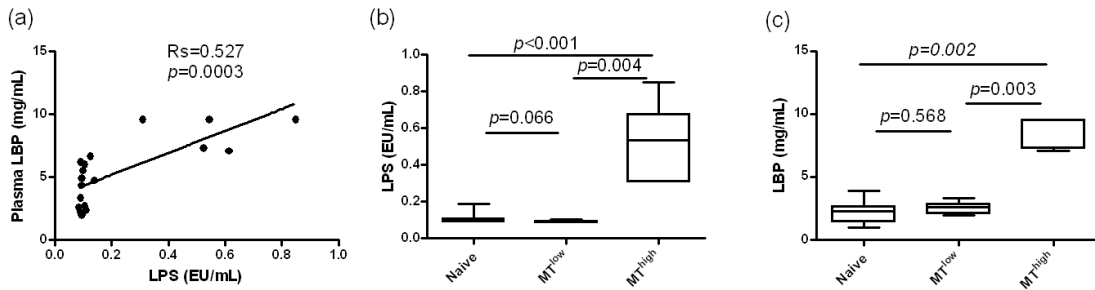

**Fig. S2. Schematic representation of the gating strategy used to identify (a) lymphocytes, (b) NK cells, and (c) NKp44<sup>+</sup> NK cells among mononuclear cells in PBMCs from experimental monkeys.**

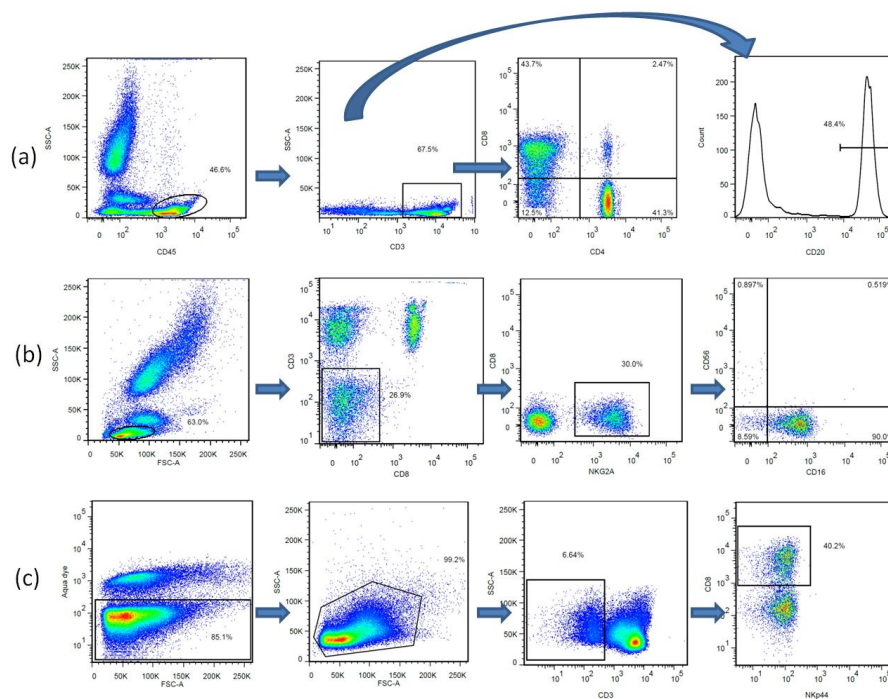

**Fig. S3. Status of infection, plasma viral loads, and CD4<sup>+</sup> T cell numbers in SIVmac239-infected monkeys during study phase II.**

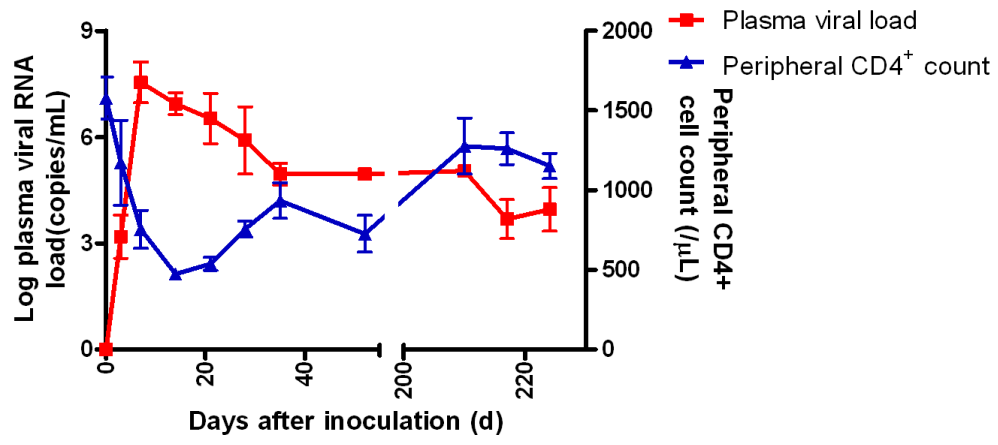

Supplement: f1 [file 387950.f1.pdf]
